# Supplementary material for: A sustainable layered double hydroxide-pine cone biochar (LDH/PCBC) composite for enhanced removal of ciprofloxacin from water
Source: Royal Society of Chemistry journal article supplement (doi:10.1039/d4nj02064b), 2024-01-01
Supplement: d4nj02064b1.pdf [file d4nj02064b1.pdf]

**A Sustainable Layered Double Hydroxide-Pine Cone Biochar (LDH/PCBC) composite for  
Enhanced Removal of Ciprofloxacin from Water**

**Prakash Bobde<sup>a</sup>, Jitendra Kumar Pandey<sup>b</sup>, Ranjit Kumar<sup>c</sup>, Amit Kumar Sharma<sup>d</sup>, Sukdeb  
Pal<sup>e</sup>, Shikha Wadhwa<sup>f\*</sup>**

<sup>a</sup>Department of Research & Development, UPES, Energy Acres Building, Bidholi, Dehradun-248007, Uttarakhand, India

<sup>b</sup>School of Engineering, UPES, Energy Acres Building, Bidholi, Dehradun-248007, Uttarakhand, India

<sup>c</sup>Center for Advanced Materials, Department of Chemical Engineering, Shiv Nadar Institution of Eminence, Delhi-NCR-201314, India

<sup>d</sup>Center for Alternate Energy Research, UPES, Bidholi, Dehradun-248007, Uttarakhand, India

<sup>e</sup>Wastewater Technology Division, CSIR-National Environmental Engineering Research Institute, Nagpur, Maharashtra 440020, India

<sup>f</sup>Applied Science Cluster, School of Advanced Engineering, UPES, Energy Acres Building, Bidholi, Dehradun-248007, Uttarakhand, India

**SUPPLEMENTARY INFORMATION**

**Table S1:** The distribution and amount of the encrypted units from the RSM experiments

| Independent variables         | Ranges and levels |     |     |     |           |
|-------------------------------|-------------------|-----|-----|-----|-----------|
|                               | $-\alpha$         | -1  | 0   | +1  | $+\alpha$ |
| pH(A)                         | 2                 | 3   | 7   | 11  | 12        |
| LDH/PCBC dose (B)(g/L)        | 0.05              | 0.1 | 0.3 | 0.5 | 0.55      |
| Concentration of CPF(C)(mg/L) | 31.25             | 50  | 125 | 200 | 218.75    |
| Temperature (D)(K)            | 279.25            | 283 | 298 | 313 | 316.75    |

**Table S2:** Adsorption capacity values for the adsorption of CPF on LDH/PCBC obtained using CCD and RSM

| Run No. | pH | LDH/PCBC dose (g/L) | Initial CPF concentration (mg/L) | Temperature (K) | Experimental | Predicted | Residual |
|---------|----|---------------------|----------------------------------|-----------------|--------------|-----------|----------|
| 1       | 3  | 0.1                 | 50                               | 283             | 54.28        | 53.09     | 1.20     |
| 2       | 11 | 0.1                 | 50                               | 283             | 52.83        | 50.98     | 1.85     |
| 3       | 3  | 0.5                 | 50                               | 283             | 87.17        | 86.19     | 0.98     |
| 4       | 11 | 0.5                 | 50                               | 283             | 85.50        | 84.82     | 0.68     |

|    |    |      |     |     |       |       |       |
|----|----|------|-----|-----|-------|-------|-------|
| 5  | 3  | 0.1  | 200 | 283 | 45.13 | 43.33 | 1.80  |
| 6  | 11 | 0.1  | 200 | 283 | 42.73 | 41.25 | 1.48  |
| 7  | 3  | 0.5  | 200 | 283 | 75.57 | 75.25 | 0.32  |
| 8  | 11 | 0.5  | 200 | 283 | 74.58 | 73.92 | 0.66  |
| 9  | 3  | 0.1  | 50  | 313 | 79.26 | 79.00 | 0.26  |
| 10 | 11 | 0.1  | 50  | 313 | 77.18 | 77.16 | 0.02  |
| 11 | 3  | 0.5  | 50  | 313 | 95.29 | 96.43 | -1.15 |
| 12 | 11 | 0.5  | 50  | 313 | 94.45 | 95.34 | -0.88 |
| 13 | 3  | 0.1  | 200 | 313 | 69.06 | 69.41 | -0.35 |
| 14 | 11 | 0.1  | 200 | 313 | 67.53 | 67.60 | -0.07 |
| 15 | 3  | 0.5  | 200 | 313 | 84.72 | 85.66 | -0.93 |
| 16 | 11 | 0.5  | 200 | 313 | 83.74 | 84.60 | -0.86 |
| 17 | 2  | 0.3  | 125 | 298 | 78.51 | 79.81 | -1.30 |
| 18 | 12 | 0.3  | 125 | 298 | 75.93 | 77.83 | -1.90 |
| 19 | 7  | 0.05 | 125 | 298 | 51.29 | 55.84 | -4.55 |
| 20 | 7  | 0.55 | 125 | 298 | 88.50 | 87.15 | 1.35  |
| 21 | 7  | 0.3  | 31  | 298 | 91.37 | 93.33 | -1.96 |
| 22 | 7  | 0.3  | 218 | 298 | 79.28 | 80.52 | -1.24 |
| 23 | 7  | 0.3  | 125 | 279 | 64.03 | 70.80 | -6.77 |
| 24 | 7  | 0.3  | 125 | 316 | 97.24 | 93.67 | 3.57  |
| 25 | 7  | 0.3  | 125 | 298 | 87.00 | 84.43 | 2.57  |
| 26 | 7  | 0.3  | 125 | 298 | 86.92 | 84.43 | 2.49  |
| 27 | 7  | 0.3  | 125 | 298 | 87.17 | 84.43 | 2.74  |

**Table S3:** ANOVA results for adsorption capacity of CPF by using LDH/PCBC

| Source                      | Sum of square | DDL | Mean square | F-value | p-value  |
|-----------------------------|---------------|-----|-------------|---------|----------|
| Model                       | 6117.23       | 14  | 436.95      | 40.86   | < 0.0001 |
| A-pH                        | 12.02         | 1   | 12.02       | 1.12    | 0.3099   |
| B-LDH/PCBC dose             | 3000          | 1   | 3000        | 280.56  | < 0.0001 |
| C-Initial CPF concentration | 502.43        | 1   | 502.43      | 46.99   | < 0.0001 |
| D-Temperature               | 1600.72       | 1   | 1600.72     | 149.7   | < 0.0001 |
| AB                          | 0.5576        | 1   | 0.5576      | 0.0521  | 0.8232   |
| AC                          | 0.0011        | 1   | 0.0011      | 0.0001  | 0.9919   |
| AD                          | 0.0718        | 1   | 0.0718      | 0.0067  | 0.936    |
| BC                          | 1.39          | 1   | 1.39        | 0.1299  | 0.7248   |
| BD                          | 245.54        | 1   | 245.54      | 22.96   | 0.0004   |
| CD                          | 0.0269        | 1   | 0.0269      | 0.0025  | 0.9609   |
| A <sup>2</sup>              | 75.58         | 1   | 75.58       | 7.07    | 0.0208   |
| B <sup>2</sup>              | 401.82        | 1   | 401.82      | 37.58   | < 0.0001 |
| C <sup>2</sup>              | 14.96         | 1   | 14.96       | 1.4     | 0.2599   |
| D <sup>2</sup>              | 11.59         | 1   | 11.59       | 1.08    | 0.3183   |
| Total Error                 | 128.32        | 12  |             |         |          |
| Total (corr.)               | 6245.55       | 26  |             |         |          |

**Table S4:** Cost analysis of LDH/PCBC biochar development for real scale applications

| <b>Expense head</b>       | <b>Details</b>                 | <b>Estimate (\$)</b> |
|---------------------------|--------------------------------|----------------------|
| Raw materials             | 10 tons of biochar waste       | 300                  |
|                           | Solvents/chemicals             | 200                  |
| Utilities                 | Electricity-500kWh/month       | 50                   |
|                           | Water-10 cubic meters/month    | 20                   |
| Production cost           | Modification of PCBC           | 1,300                |
|                           | Application cost \$80/ton      | 640                  |
| Testing & quality control |                                | 1,000                |
| Overhead                  | R & D                          | 1,400                |
|                           | Administrative                 | 800                  |
| Labour                    | 150 hours/month (1 technician) | 1,000                |
| Waste management          |                                | 700                  |
| Contingency               |                                | 500                  |
|                           | <b>TOTAL</b>                   | <b>7,910</b>         |

The yield of LDH/PCBC is around 80%, *i.e.* 8 tons/10 tons

Hence, the cost per unit (per ton of LDH/PCBC) is  $\$7,910/8 = \$988.75$  per ton.

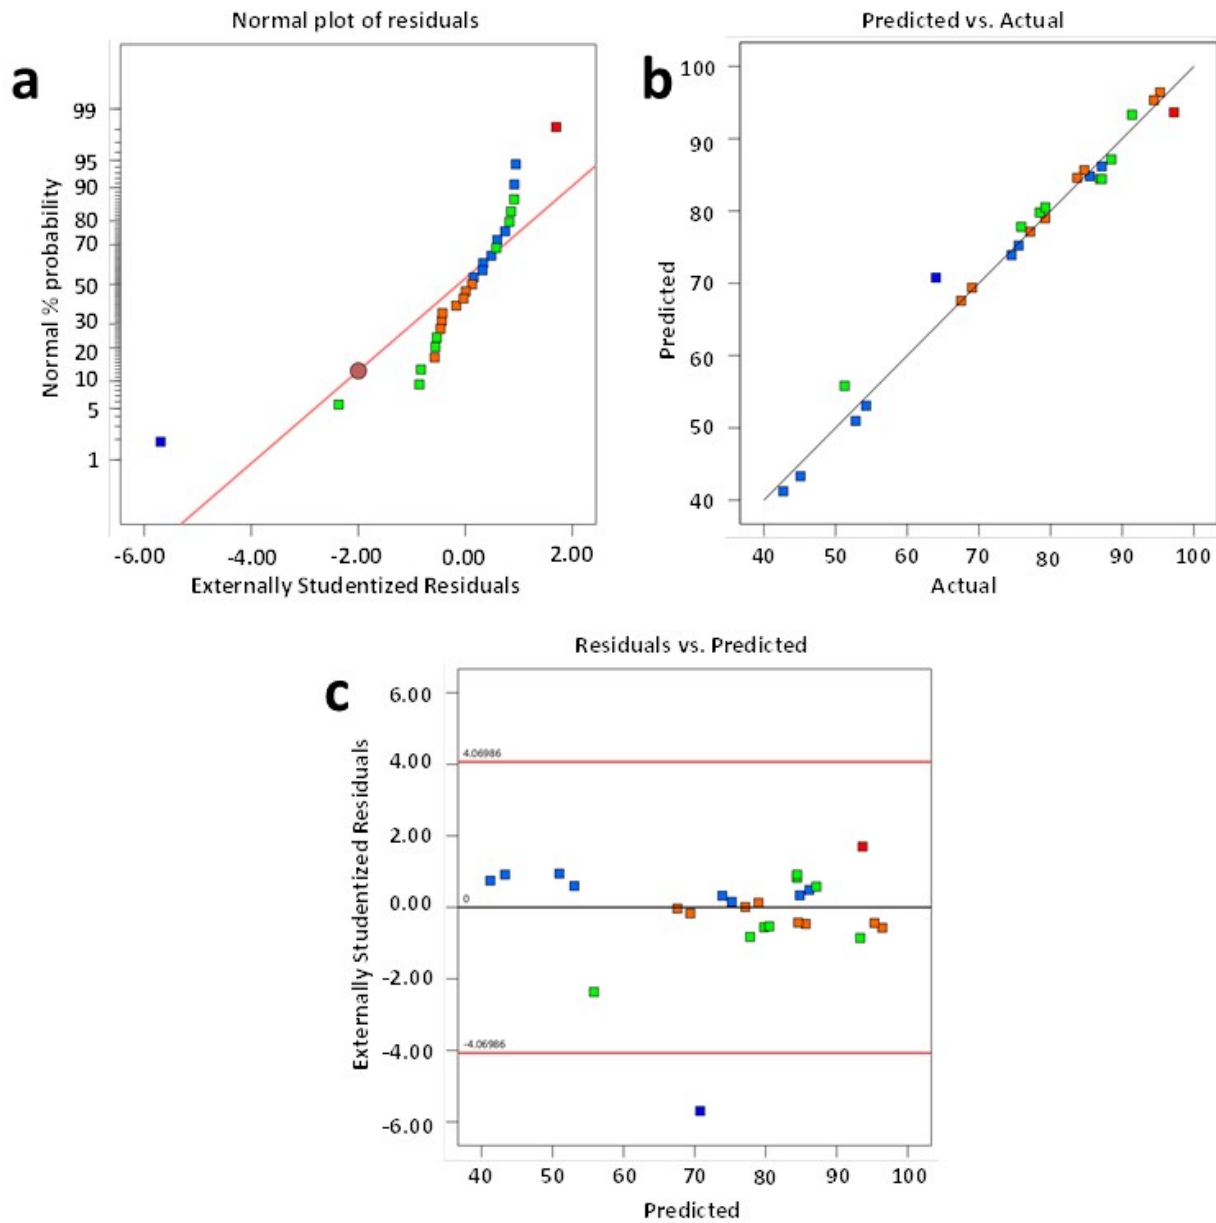

Figure S1. Diagnostic plots of the quadratic model: a) Normal probability versus externally studentized residuals; (b) externally studentized residuals against predicted (c) predicted against actual
